# Supplementary material
Source: bioRxiv or medRxiv preprint supplement (https://www.biorxiv.org/highwire/filestream/92959/field_highwire_adjunct_files/7/302307-6.pdf)
Supplement: Supplementary file [file 302307-6.pdf]

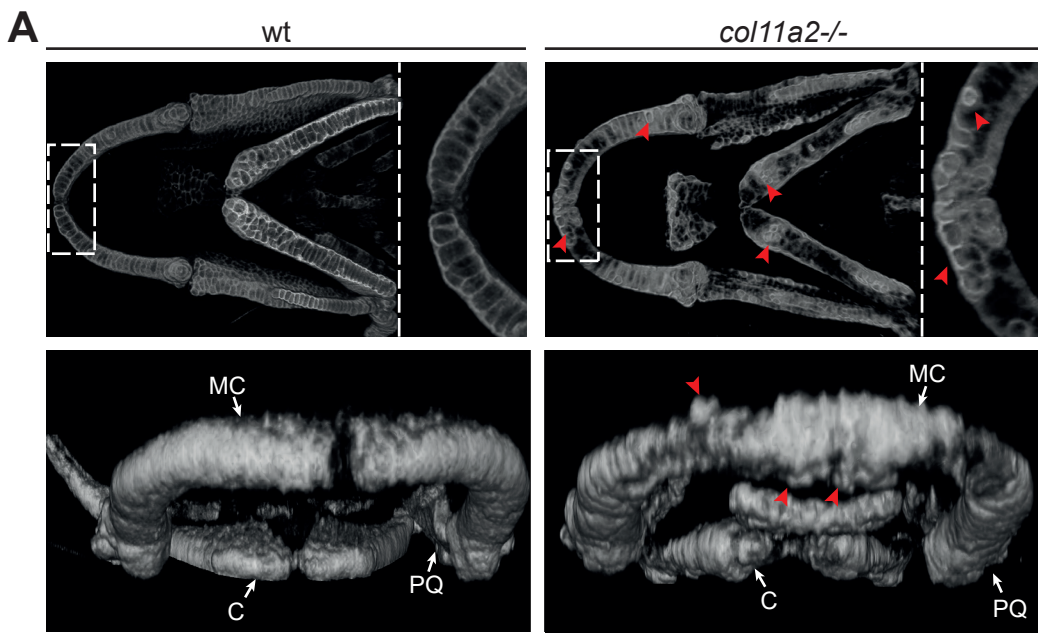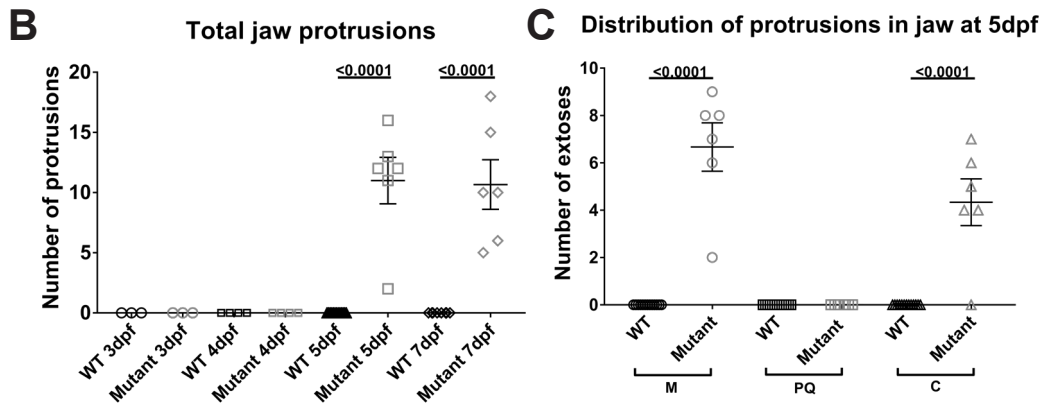

**Supplementary Figure 6: Chondrocytes in *col11a2* mutants protrude from some lower jaw cartilage elements in areas of high strain.** A) 3D volume renders of wt and *col11a2*<sup>-/-</sup> zebrafish at 7 dpf. Dashed inset shows Meckel's symphysis at higher magnification, red arrowheads = protruding cells. B) Quantification of protruding cells in wt and *col11a2*<sup>-/-</sup> zebrafish at 3-7 dpf (n=3,3,4,4,13,6,8,18). C) Quantification of protrusions in the Meckel's cartilage (M), palatoquadrate (PQ) and ceratohyal (C) in 5 dpf wt and *col11a2*<sup>-/-</sup> fish (n=13 for wt and 6 for *col11a2*<sup>-/-</sup>). Student's unpaired t-tests performed in B and C, data is mean with SEM.
